# Supplementary material
Source: Springer Nature journal article supplement (https://www.springermedizin.de/resource/supplementary/12885_2012_3881_MOESM4_ESM.pdf/9464634)

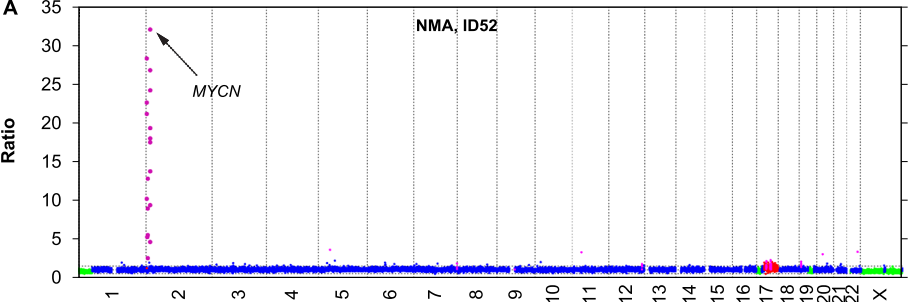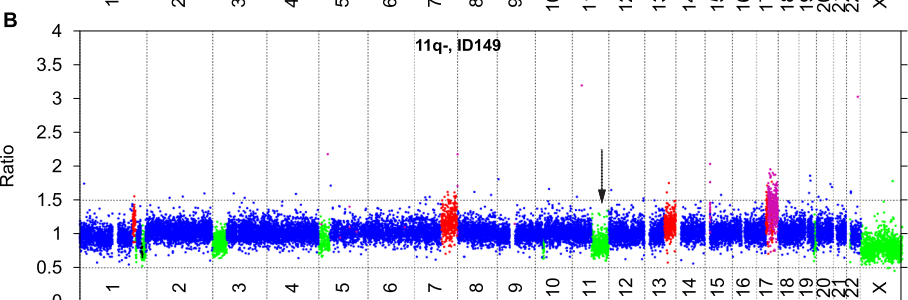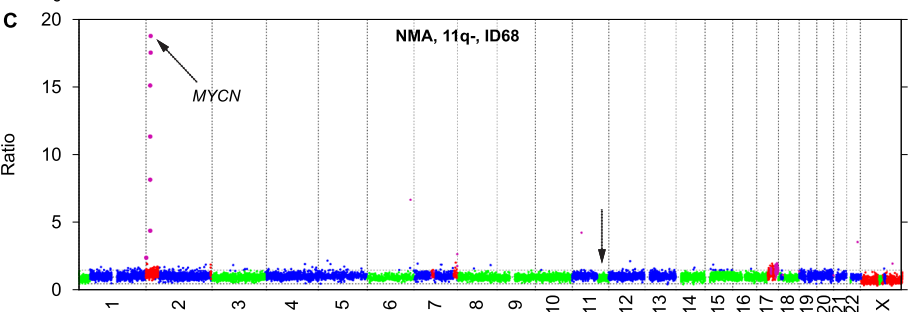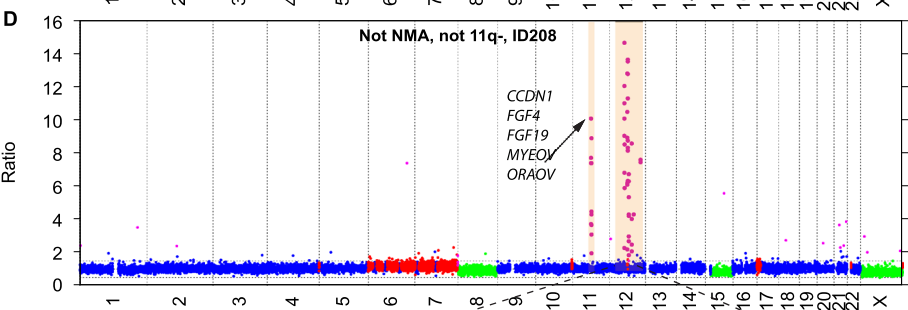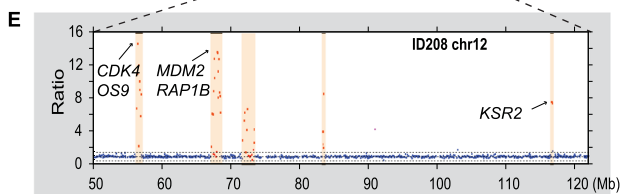

Supplement: MOESM4 [file 9464634]
